# Supplementary material
Source: PubMed Central journal article supplement (PMC4829122)
Supplement: NIHMS713315-supplement-supp_files.pdf [file NIHMS713315-supplement-supp_files.pdf]

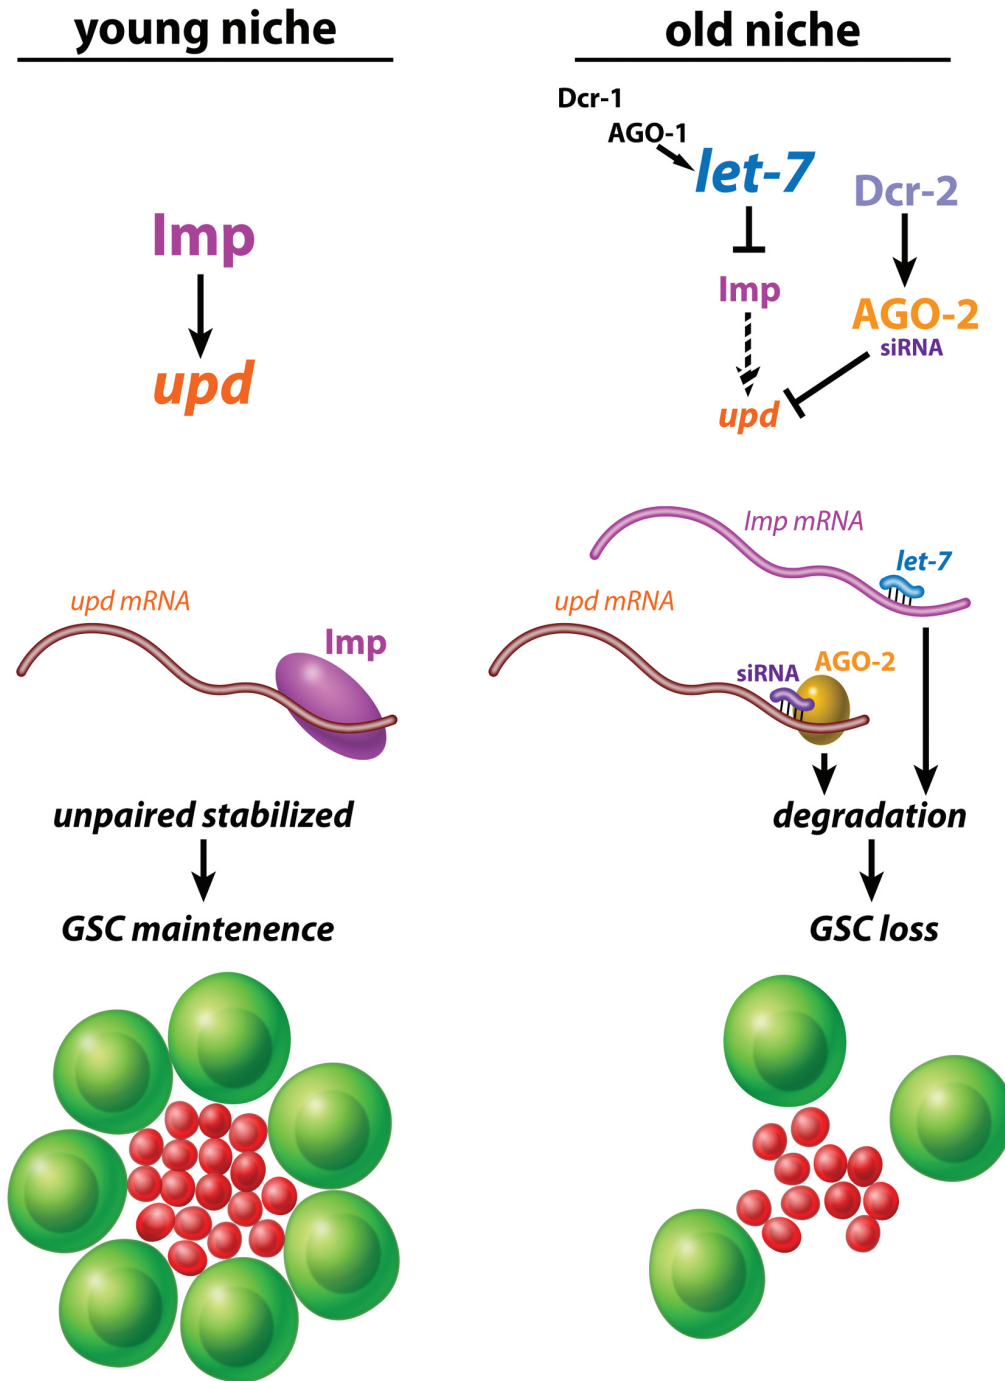

**Figure S1: A proposed mechanism for aging of the *Drosophila* testis stem cell niche.** In young adults, Imp binds to sequences primarily in the first 33 nucleotides of *upd* 3'UTR to protect against siRNA binding, thereby stabilizing *upd*. In older adults, expression of *let-7* in hub cells increases, leading to a decline in Imp expression in hub cells. Loss of Imp exposes *upd* mRNA to Dcr-2/AGO2-mediated degradation via siRNAs, resulting in reduced *upd* mRNA, a decline in niche function, and a loss of GSCs.

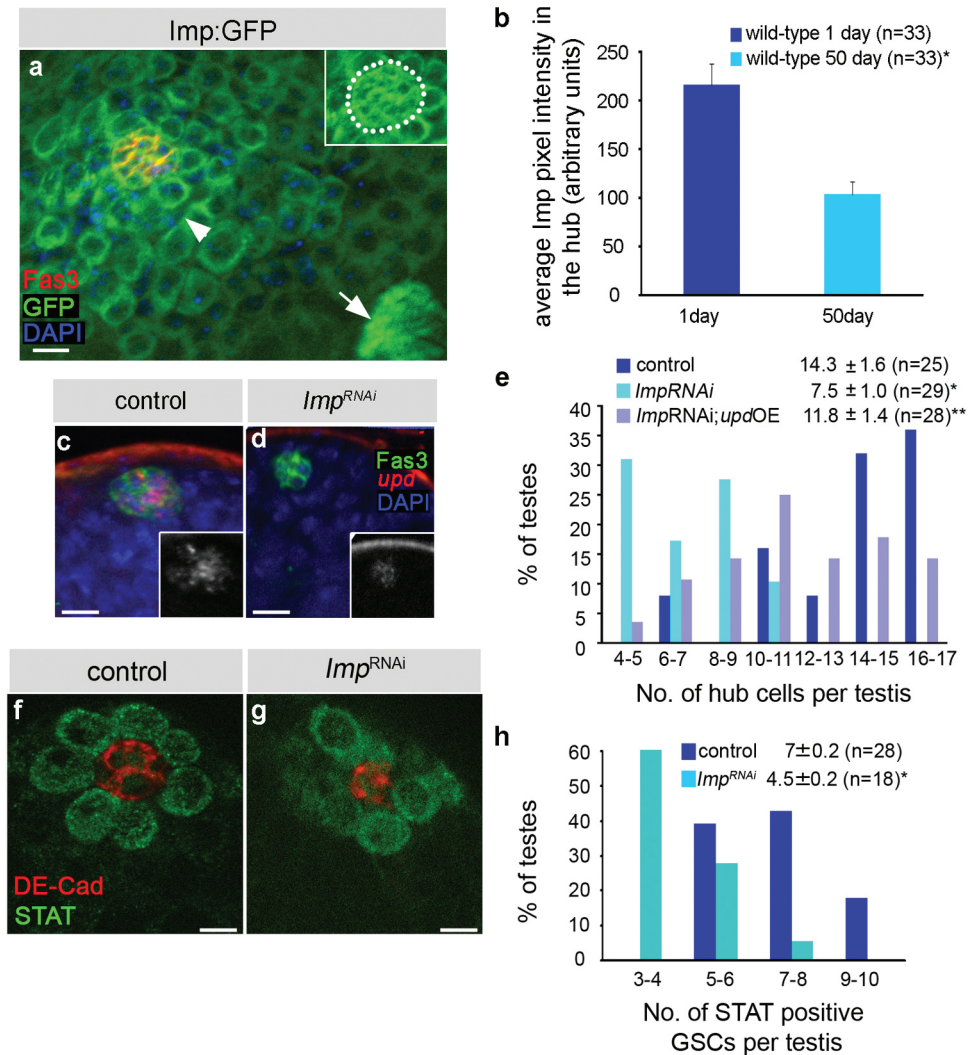

**Figure S2: Imp expression and effects on *upd* mRNA.** **a**, Testis from a 1-day old adult with *Imp:GFP* (green) *Fas3* (red) and DAPI (blue). *Imp:GFP* is expressed in the hub (outlined, inset), in GSCs (arrowhead) and at the base of sperm bundles (arrow). **b**, Densitometric analysis of *Imp* staining in the hub from 1 or 50 day old males, shows ~ 50% decrease in aged males. **c-d**, Dual labeling for *Fas3* (green) and for *upd* mRNA (red) from 10-day old flies from control, **c** (*w<sup>1118</sup>, updGAL4, UAS-gfp* outcrossed to *w<sup>1118</sup>*) or *Imp<sup>RNAi</sup>*, **d** (*w<sup>1118</sup>, updGAL4, UAS-gfp; UAS-Imp<sup>RNAi</sup>*). **e** Distribution of the number of hub cells in testes from 10-day old: control (dark blue), *Imp<sup>RNAi</sup>* (light blue) and *Imp<sup>RNAi</sup>; upd<sup>OE</sup>* (purple) (*w<sup>1118</sup>, updGAL4, UAS-gfp; UAS-Imp<sup>RNAi</sup> UASImp<sup>T21</sup>*). **f-g**, Testis from 10-day old flies immunolabeled for STAT (green) and DE-Cadherin (red) from: control, **f** (*w<sup>1118</sup>, updGAL4, UAS-gfp* outcrossed to *w<sup>1118</sup>*) or *Imp<sup>RNAi</sup>*, **g** (*w<sup>1118</sup>, updGAL4, UAS-gfp; UAS-Imp<sup>RNAi</sup>*). **h**, Distribution of the number of STAT positive GSCs as in **f, g**. Note reduction of STAT positive GSCs and *upd* signal upon loss of *Imp* (insets in **c, d**). Densitometric quantification of *upd* signal in hubs of **c**: control  $112 \pm 8$  (n=14) and **d**: *Imp<sup>RNAi</sup>*  $59 \pm 2$  (n=14) revealed a 47% decrease in *upd* levels when *Imp* levels are reduced in the hub.



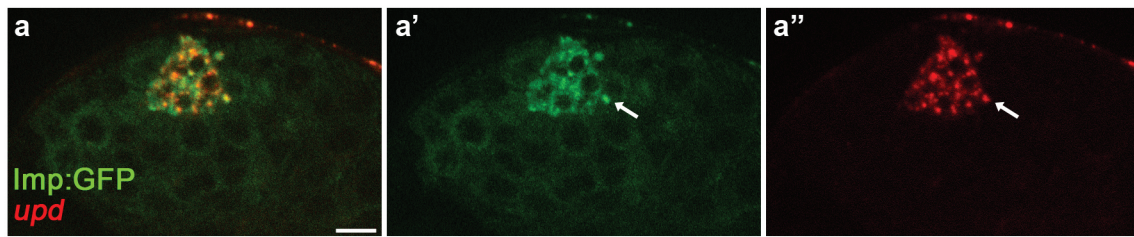

**Figure S4: Imp co-localizes with *upd* in vivo. a-a''**, High magnification view of Imp:GFP (green) expression in the testis from a 1-day old adult, labeled for GFP (green) and FISH for *upd* mRNA (red). (a) Merged image. Notice co-localization of *upd* mRNA and Imp:GFP protein in hub cells. Germ cells are out of the plane of focus.



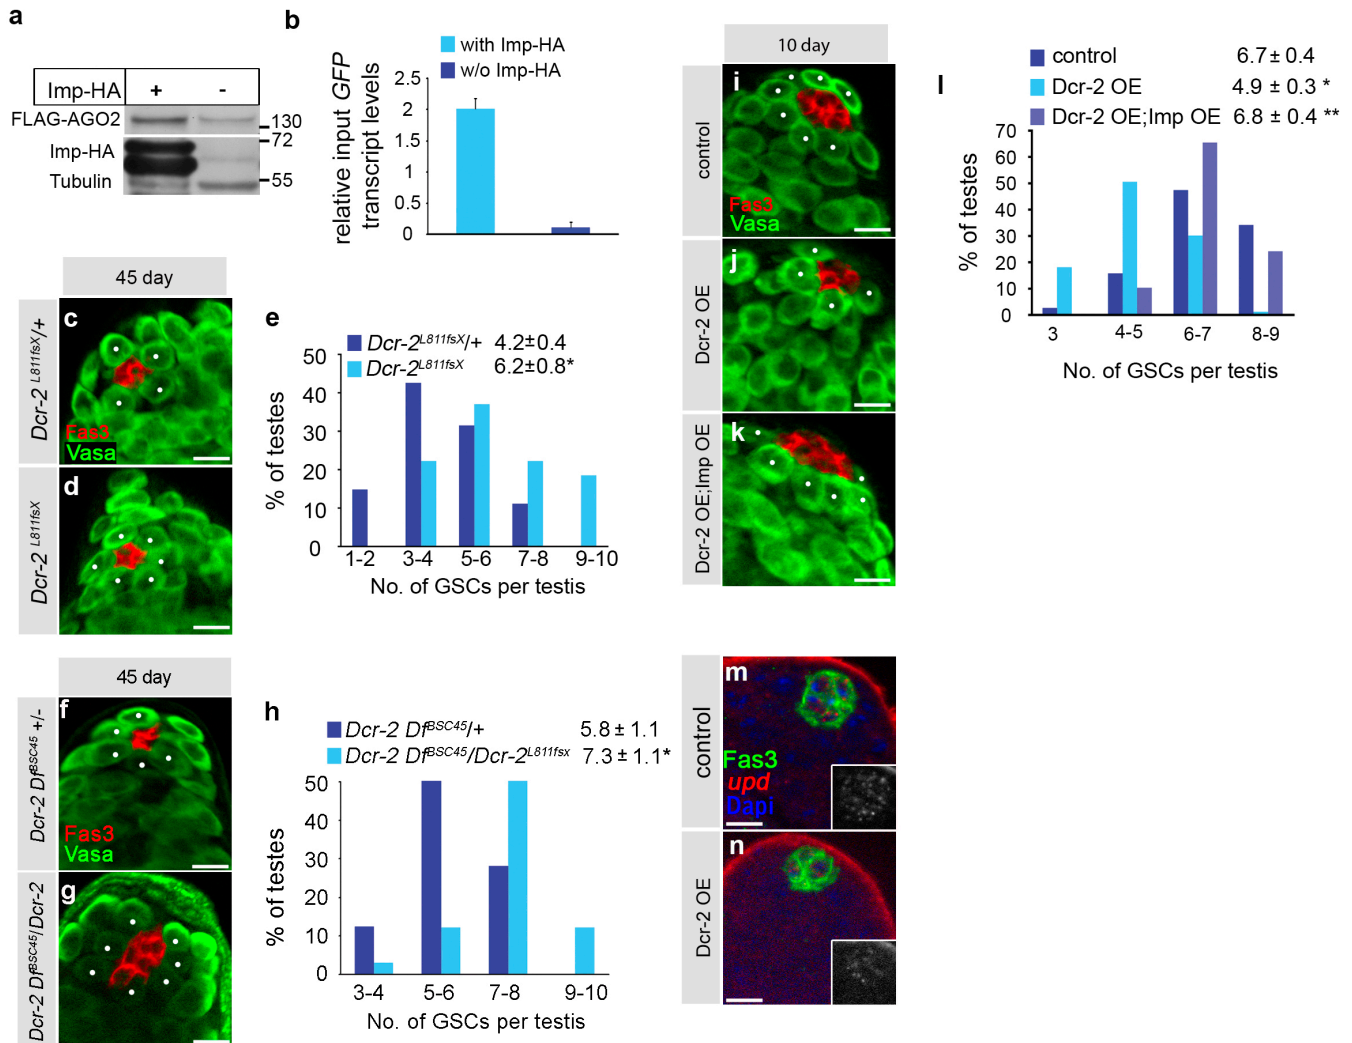

### Figure S5: The siRNA machinery regulates *upd* levels and GSCs.

**a-b**, FLAG-AGO2 RIP from S2 cells stably expressing FLAG-AGO2 and transiently expressing *gfp-upd3'UTR* with (light blue) or without (dark blue) Imp-HA. **(a)**, Immunoblot showing input levels of FLAG-AGO2, Imp-HA and Tubulin; **(b)** qRT-PCR showing input *gfp* levels normalized to *rp49*. **c-d** GSCs number in heterozygous (**c**, *Dcr-2<sup>L811fsX/+</sup>*) and *Dcr-2* homozygous (**d**, *Dcr-2<sup>L811fsX</sup>*) 45-day old males. **e**, Distribution of GSCs, as in **c** (n=54) and **d** (n=28). **f-g**, Testes from 45-day old heterozygous, control (**f**, *Df(2R)BSC45/+*) and *Dcr-2* null, mutant (**g**, *Df(2R)BSC45/Dcr-2<sup>L811fsX</sup>*) males co-labeled with Vasa (green) and Fas3 (red). **h**, GSC distribution per testis as in **f** (n=32) and **g** (n=33). **i-k**, Testes from 10-day old males of genotypes: **(i)** *w<sup>1118</sup>, updGAL4, UAS-gfp* outcrossed to *w<sup>1118</sup>*; **(j)** *w<sup>1118</sup>, updGAL4, UAS-gfp; UAS-Dcr-2*; **(k)** *w<sup>1118</sup>, updGAL4, UAS-gfp; UAS-Dcr-2; UAS-Imp<sup>T21</sup>*. **l**, Distribution of GSCs, as in **i** (n=38), **j** (n=83) and **k** (n=29). **m-n**, Dual labeling for Fas3 (green) and *upd* mRNA (red) of testis from 10-day control (**m**, *w<sup>1118</sup>, updGAL4, UAS-gfp* outcrossed to *w<sup>1118</sup>*) or *Dcr-2* OE in the hub (**n**, *w<sup>1118</sup>, updGAL4, UAS-Dcr-2*) flies. Note reduction of *upd* when *Dcr-2* is overexpressed (**n**, inset). **e, l** The average number ± 95% confidence interval is shown. Asterisks denote a statistically significant difference (\*) from controls (\*\*) from *Dcr2* overexpression (**l**) (student's t-test *p*<0.01). GSC: white dots. Scale bars, 10µm.

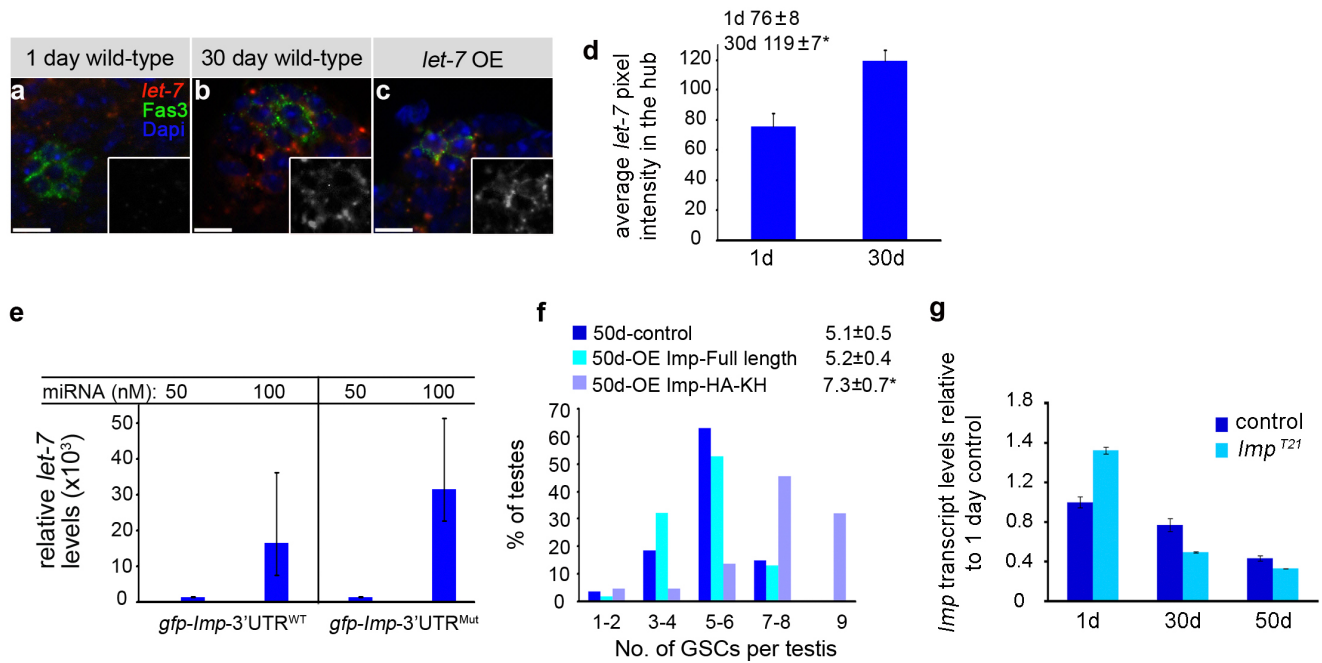

### Figure S6: *Imp* is targeted by the *let-7* miRNA in the testis

**a-c**, Dual labeling with Fas3 (green), *let-7* (red, insets) and DAPI (blue) of testes from 1 (**a**) and 30 (**b**) day-old wild-type flies, and from (**c**) 1-day old fly overexpressing *let-7* in the hub (*updGAL4; UAS-let-7<sup>701.12.9j</sup>*). **d**, Quantification of *let-7* signal in the hub shows increased expression in aged flies, 1day (n=13) and 30day (n=24). **e**, qRT-PCR for mature *let-7* expression in S2 cells, relative to *bantam*. **f**, Distribution of GSCs in testes from 50-day old controls (dark blue, n=27): *w, updGAL4, UAS-gfp* outcrossed to *w<sup>1118</sup>*, *Imp* Full length (light blue, n=53): *w, updGAL4, UAS-gfp; UASImp<sup>T21</sup>* or *Imp* with a truncated 3'UTR (purple, n=41): *w, updGAL4; UAS-Imp<sup>HA-KH1-3-3</sup>*. **g**, qRT-PCR showing relative *Imp* mRNA in testes from 1-, 30- and 50-day old control flies (*w-, updGAL4, UASgfp* outcrossed to *w<sup>1118</sup>*, dark blue) or flies overexpressing *Imp* with a full length 3'UTR (*imp T21*) in hub cells (*w-, updGAL4, UASgfp; UASImpT21* flies, light blue). *Imp* overexpression in young (1 day-old) flies was not maintained with age. **d, f** The average number ± 95% confidence interval is shown. Asterisks denote a statistically significant difference (\*) from controls (student's t-test \*p<0.01). Scale bars, 10µm.
